# Supplementary material for: Smart electrochromic supercapacitors based on highly stable transparent conductive graphene/CuS network electrodes
Source: Royal Society of Chemistry journal article supplement (doi:10.1039/c7ra04476c), 2017-01-01
Supplement: c7ra04476c2.pdf [file c7ra04476c2.pdf]

Electronic Supplementary Material (ESI) for RSC Advances.  
This journal is © The Royal Society of Chemistry 2017

Electronic Supplementary Information (ESI)

## **Smart Electrochromic Supercapacitors Based on Highly Stable Transparent Conductive Graphene/CuS Network Electrodes**

*Peijian Yao<sup>+a</sup>, Shuyao Xie<sup>+a</sup>, Meidan Ye<sup>a</sup>, Rui Yu<sup>a</sup>, Qian Liu<sup>a</sup>, Dandan Yan<sup>a</sup>, Weiwei Cai<sup>a</sup>,  
Wenxi Guo<sup>\*a</sup> and Xiang Yang Liu<sup>\*ab</sup>*

<sup>a</sup>Research Institute for Soft Matter and Biomimetics, Fujian Provincial Key Laboratory for Soft Functional Materials Research, College of Materials, Department of Physics, Xiamen University, Xiamen 361005, China.

<sup>b</sup>Department of Physics, Faculty of Science, National University of Singapore, Singapore, 117542, Singapore

+ Authors contributed equally to this work.

\* Corresponding authors. E-mail: wxguo@xmu.edu.cn, phyluxy@nus.edu.sg

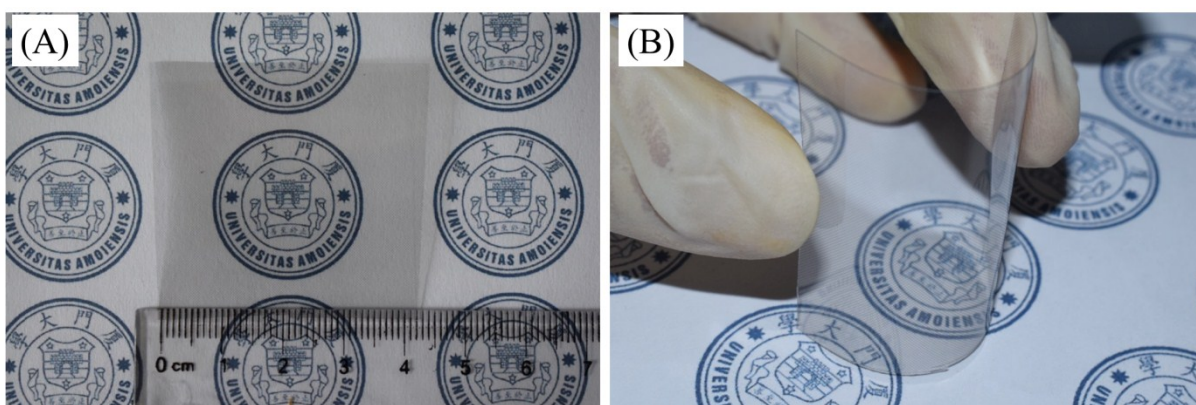

**Fig. S1** Photographs of G-GuS samples with a size of about  $4 \times 4 \text{ cm}^2$  in forms of (a) plane and (b) bend.

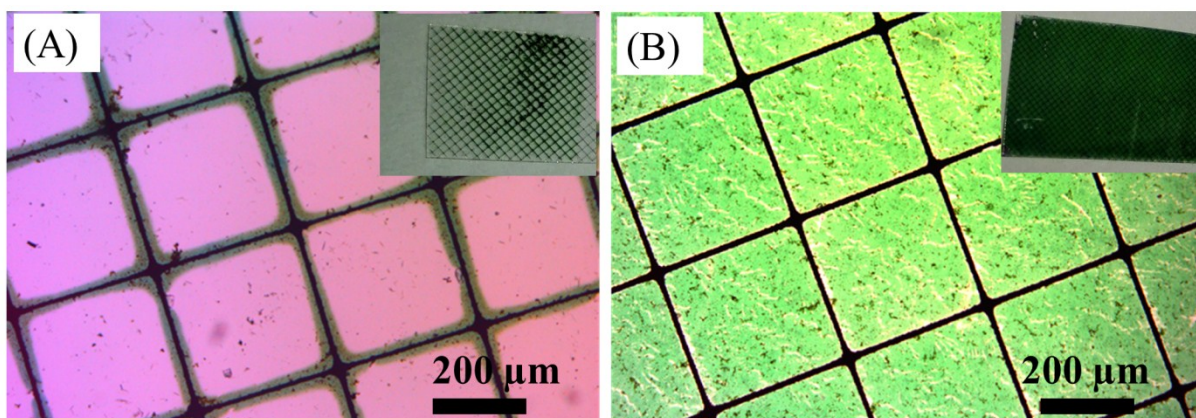

**Fig. S2** Optical microscope images (inset photographs took by a cell phone) of PANI electrodeposited on (a) CuS and (b) G-CuS.

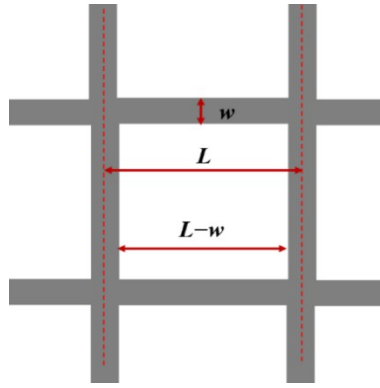

**Fig. S3** Parameters for a metal grid film:  $L$  is the center-to-center spacing, and  $w$  is the width of grid line. The theoretical transmittance ( $T\%$ ) of the metal grid film can be calculated on the basis of the design shown in Fig. S3<sup>1</sup>:

$$T\% = \frac{A_{\text{empty}}}{A_{\text{total}}} \times 100\% = \frac{(L-w)^2}{L^2} \times 100\% \quad (1)$$

where  $A_{\text{empty}}$  refers to the empty area covered without grid lines, and  $A_{\text{total}}$  is the total area, and  $L$  is the center-to-center spacing, and  $w$  is the grid line width.

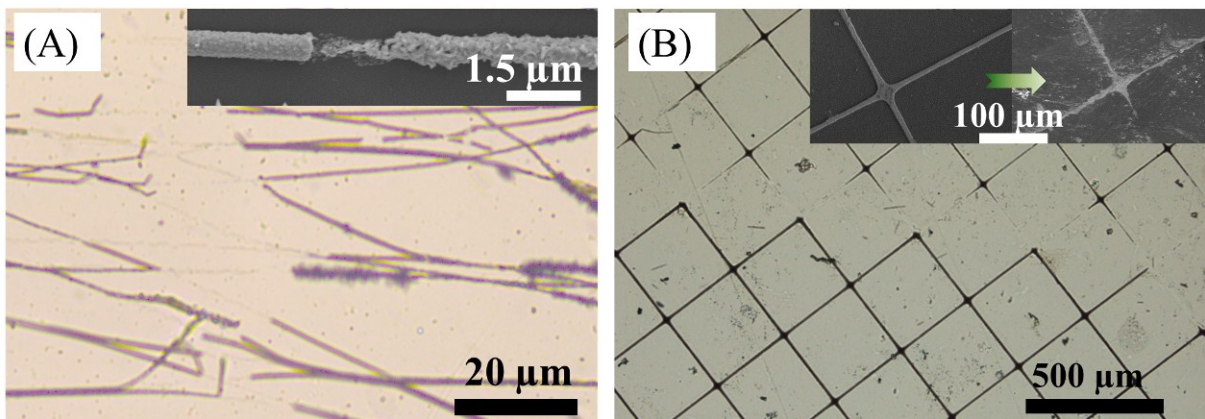

**Fig. S4** (a) An optical microscope image of Ag network after electrodeposition for 22 s under a galvanostatic current density of  $0.1 \text{ mA cm}^{-2}$  in  $0.5 \text{ M H}_2\text{SO}_4$  aqueous solution containing  $0.2 \text{ M}$  aniline. Electrolysis took place in Ag fibers, and the SEM image (inset) clearly revealed that an Ag fiber was oxidized to break. (b) An optical microscope image of G-Cu after electrodeposition for 980 s. The Cu grids were broken because of electrolysis as shown by inset SEM images.

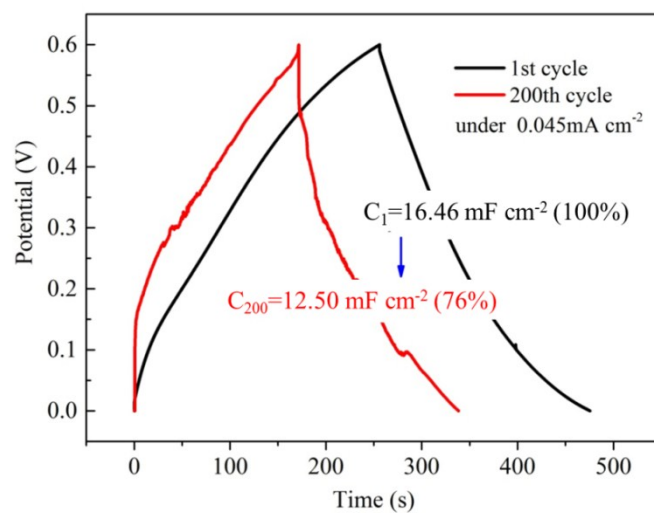

**Fig. S5** Galvanostatic charge-discharge cyclic curves of G-CuS/PANI in the potential range of 0 to 0.6 V under a current density of  $0.045 \text{ mA cm}^{-2}$  for 200 cycles.

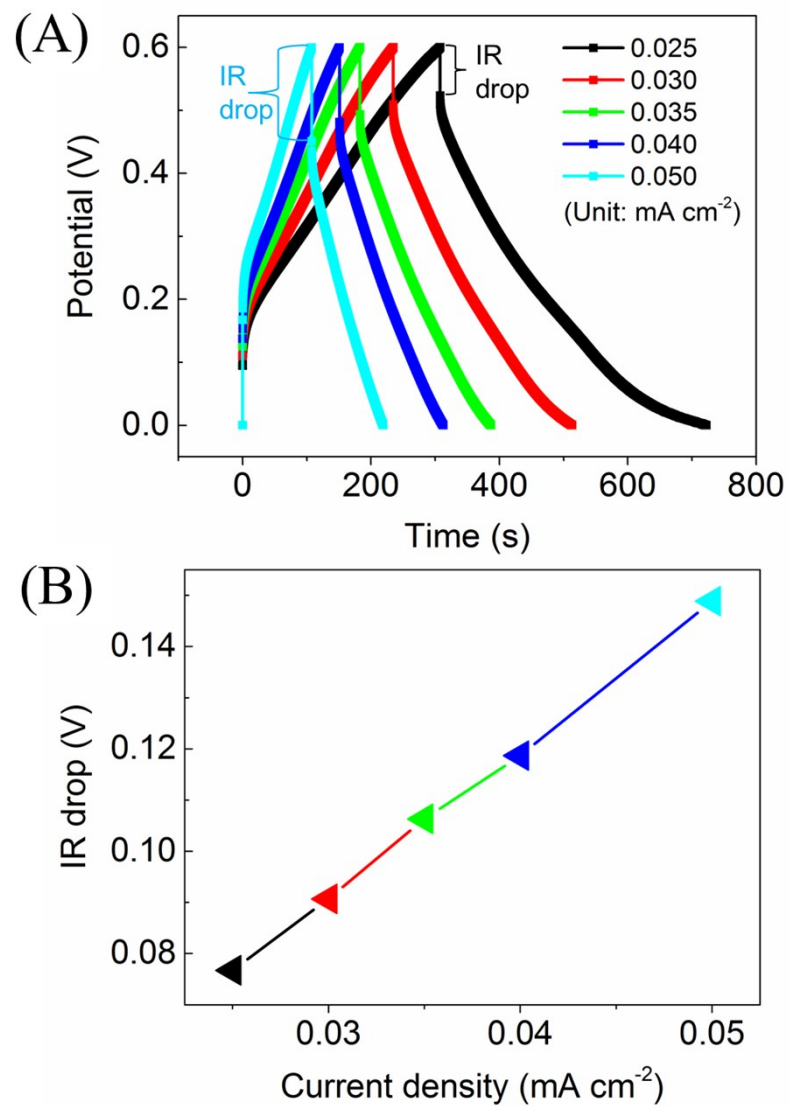

**Fig. S6** (a) IR drops in galvanostatic charge-discharge curves at the different current densities. (b) IR drop of G-CuS/PANI as a function of the current density.

## Reference

1. Y. Zhu, Z. Sun, Z. Yan, Z. Jin and J. M. Tour, *ACS Nano*, 2011, 5, 6472-6479.
